# Supplementary material for: A Low-FODMAP Diet for Irritable Bowel Syndrome: Some Answers to the Doubts from a Long-Term Follow-Up
Source: Nutrients. 2020 Aug 7;12(8):2360. doi: 10.3390/nu12082360 (PMC7468924; doi:10.3390/nu12082360)
Supplement: Supplementary file 1 [file nutrients-12-02360-s001.pdf]

## SUPPLEMENTARY FILES

**Table S1:** Dietary Acceptability Questionnaire:

1. I find it easy to buy suitable foods for my current diet at my normal supermarkets or shops

- ☐ Agree
- ☐ Neutral
- ☐ Disagree

2. I am able to buy foods suitable for my current diet at my normal supermarkets or shops

- ☐ Agree
- ☐ Neutral
- ☐ Disagree

3. I use high street/online speciality shops (e.g., health food shops) to buy food for my current diet

- ☐ Agree
- ☐ Neutral
- ☐ Disagree

4. It takes extra time to shop for my current diet

- ☐ Agree
- ☐ Neutral
- ☐ Disagree

5. It takes extra time to cook for my current diet

- ☐ Agree
- ☐ Neutral
- ☐ Disagree

6. I find food labeling is adequate to allow me to confidently choose suitable foods

- ☐ Agree
- ☐ Neutral
- ☐ Disagree

7. The cost of my current diet is more expensive

- ☐ Agree
- ☐ Neutral
- ☐ Disagree

8. Does eating out at restaurants make it more difficult for you to follow your current diet?

- ☐ Agree
- ☐ Neutral
- ☐ Disagree

9. Does eating out with friends/family make it more difficult for you to follow your current diet?

- ☐ Agree
- ☐ Neutral
- ☐ Disagree

10. Does travel (overseas/UK) make it more difficult for you to follow your current diet?

- ☐ Agree
- ☐ Neutral
- ☐ Disagree

11. Overall, I find my current diet tasty and enjoyable

- ☐ Agree
- ☐ Neutral
- ☐ Disagree

12. I can incorporate my current diet easily into my life

- ☐ Agree
- ☐ Neutral
- ☐ Disagree

13. My current dietary needs have created stress with my family/friends

- ☐ Agree
- ☐ Neutral
- ☐ Disagree

**Table S2: Food-related quality of life questionnaire:**

1. Food and meals are positive elements of my life

- ☐ Agree
- ☐ Neutral
- ☐ Disagree

2. I am generally pleased with my food

- ☐ Agree
- ☐ Neutral
- ☐ Disagree

3. My life in relation to food and meals is close to my ideal

- ☐ Agree
- ☐ Neutral
- ☐ Disagree

4. With regard to food, the conditions of my life are excellent

- ☐ Agree
- ☐ Neutral
- ☐ Disagree

5. Food and meals give me satisfaction in daily life

- ☐ Agree
- ☐ Neutral
- ☐ Disagree

6. I wish my meals were a much more pleasant part of my life

- ☐ Agree
- ☐ Neutral
- ☐ Disagree

7. When I think of my next meal, I only see problems, obstacles and disappointments

- ☐ Agree

- ☐ Neutral
- ☐ Disagree

**Table S3:** Anthropometric data of IBS patients at T0, T1 and T3. No significant difference was observed. The reported results are referred to the 41 patients evaluated at T3.

|                                 | T0             | T1             | T3             | p-value |
|---------------------------------|----------------|----------------|----------------|---------|
| <b>Height (cm)</b>              | 167.0 ± 1.0    | 167.0 ± 1.0    | 167.0 ± 1.0    | ns      |
| <b>Weight (kg)</b>              | 70.6 ± 15.6    | 69.4 ± 15.5    | 69.8 ± 15.5    | ns      |
| <b>BMI (kg/m2)</b>              | 25.0 ± 4.2     | 24.8 ± 4.8     | 24.8 ± 4.8     | ns      |
| <b>Wrist circumference (cm)</b> | 16.1 ± 1.3     | 15.4 ± 3.3     | 15.8 ± 2.5     | ns      |
| <b>Waist circumference (cm)</b> | 80.0 ± 12.1    | 79.6 ± 12.3    | 79.3 ± 12.2    | ns      |
| <b>Hip circumference (cm)</b>   | 101.3 ± 9.8    | 100.6 ± 9.9    | 101.1 ± 9.9    | ns      |
| <b>Arm circumference (cm)</b>   | 27.6 ± 3.1     | 27.8 ± 3.1     | 27.8 ± 3.2     | ns      |
| <b>BMR (kcal/die)</b>           | 1425.6 ± 119.0 | 1420.1 ± 118.9 | 1417.7 ± 117.9 | ns      |

**Table S4:** IBS-Symptom Severity Score results at T0, T1, T2 and T3. The reported results are referred to the 41 patients evaluated at T3.

| IBS-SSS                                         | T0          | T1          | T2          | T3          | p-value               |
|-------------------------------------------------|-------------|-------------|-------------|-------------|-----------------------|
| <b>Abdominal pain severity</b>                  | 58.3 ± 23.4 | 29.3 ± 24.0 | 26.0 ± 22.5 | 33.2 ± 22.7 | T0 vs others: p<0.001 |
| <b>Abdominal pain frequency</b>                 | 64.5 ± 29.6 | 27.1 ± 23.6 | 24.2 ± 22.6 | 28.5 ± 30.8 | T0 vs others: p<0.001 |
| <b>Abdominal distension severity</b>            | 61.7 ± 23.6 | 33.4 ± 24.7 | 31.7 ± 27.5 | 40.8 ± 24.5 | T0 vs others: p<0.001 |
| <b>Dissatisfaction with defecatory function</b> | 71.2 ± 30.3 | 51.8 ± 34.9 | 51.7 ± 34.2 | 55.2 ± 30.3 | T0 vs T1: p<0.05      |

|                                                      |              |              |              |               |                       |
|------------------------------------------------------|--------------|--------------|--------------|---------------|-----------------------|
|                                                      |              |              |              |               | T0 vs T2: p<0.05      |
| <b>Interference of IBS symptoms with life habits</b> | 70.5 ± 24.8  | 44.5 ± 31.5  | 46.1 ± 31.0  | 49.8 ± 32.4   | T0 vs others: p<0.001 |
| <b>IBS-SSS total</b>                                 | 326.2 ± 88.7 | 185.9 ± 97.0 | 174.8 ± 98.1 | 205.3 ± 106.2 | T0 vs others: <0.001  |
